# Supplementary material for: A general strategy to prepare macro-/mesoporous materials from thermoplastic elastomer blends
Source: Royal Society of Chemistry journal article supplement (doi:10.1039/d4ta01590h), 2024-01-01
Supplement: d4ta01590h1.pdf [file d4ta01590h1.pdf]

Electronic Supplementary Information for:

## A general strategy to prepare macro-/mesoporous materials from thermoplastic elastomer blends

Anthony Griffin,<sup>1</sup> Mark Robertson,<sup>1</sup> Parker Frame,<sup>1</sup> Guorong Ma,<sup>1</sup> Kevin A. Green,<sup>1</sup> Zhiqian Han,<sup>2</sup> Sarah E. Morgan,<sup>1</sup> Xiaodan Gu,<sup>1</sup> Meng Wang,<sup>2</sup> Zhe Qiang<sup>1,\*</sup>

<sup>1</sup>School of Polymer Science and Engineering, The University of Southern Mississippi, Hattiesburg, MS, 39406, USA

<sup>2</sup>Department of Civil and Environmental Engineering, University of Pittsburgh, PA, 15261, USA

Corresponding authors: Z. Q. (zhe.qiang@usm.edu)

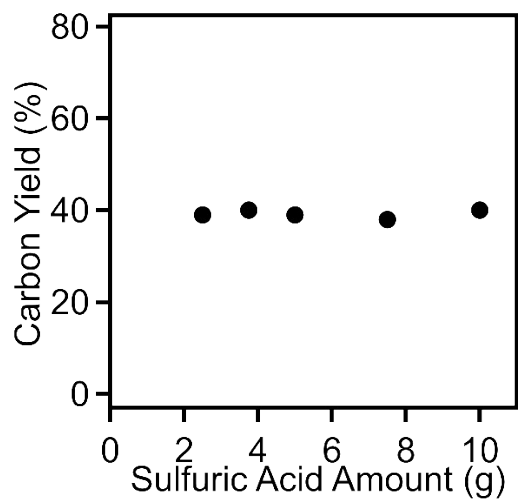

Figure S1. Carbon yield as a function of amount of sulfuric acid during the sulfonation-induced crosslinking reaction for 2 g of SIS-5.

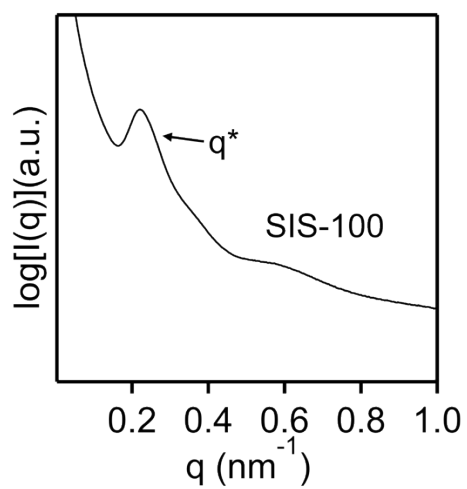

Figure S2. SAXS profile for bulk SIS.

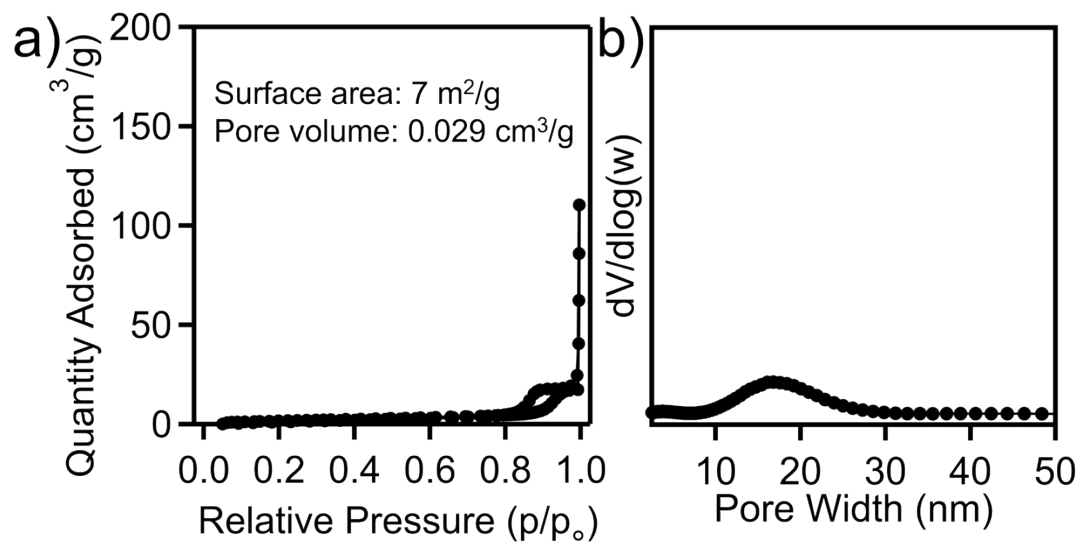

Figure S3. (a) Nitrogen adsorption isotherm and (b) corresponding pore size distribution for bulk SEBS following 12 h of sulfonation-based crosslinking at 145 °C.

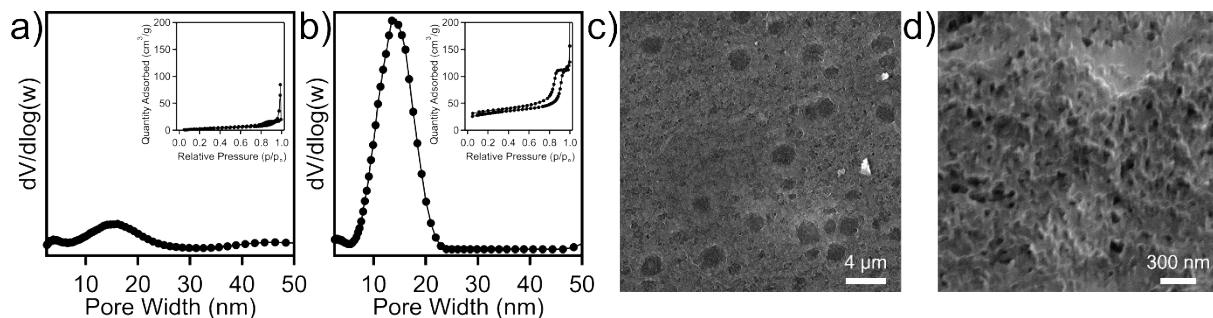

Figure S4. (a) Pore size distribution with an inset of the corresponding nitrogen adsorption isotherm of SEBS sulfonated at 145 °C for 1 h with 5 wt% PMMA. (b) Pore size distribution with an inset of the corresponding nitrogen adsorption isotherm, SEM micrographs displaying (c) macroporous and (d) mesoporous regimes of SEBS sulfonated at 145 °C for 2 h with 5 wt% PMMA.

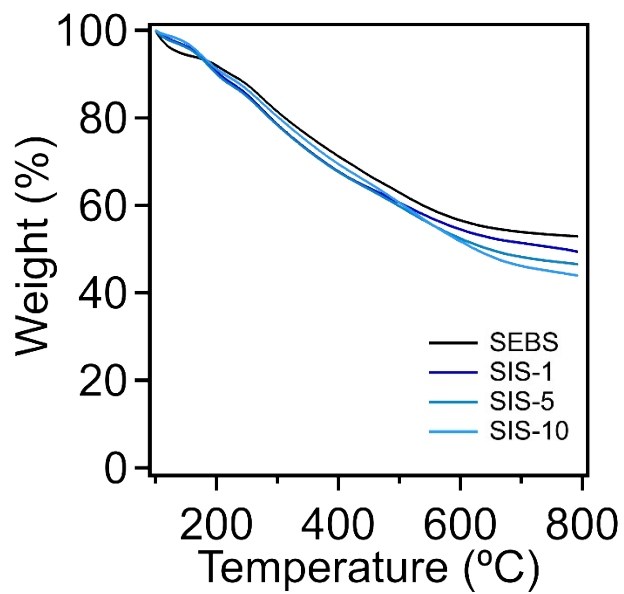

Figure S5. TGA thermograms up to 800 °C under nitrogen environment for bulk SEBS and SEBS-SIS blends sulfonated for 4 h.

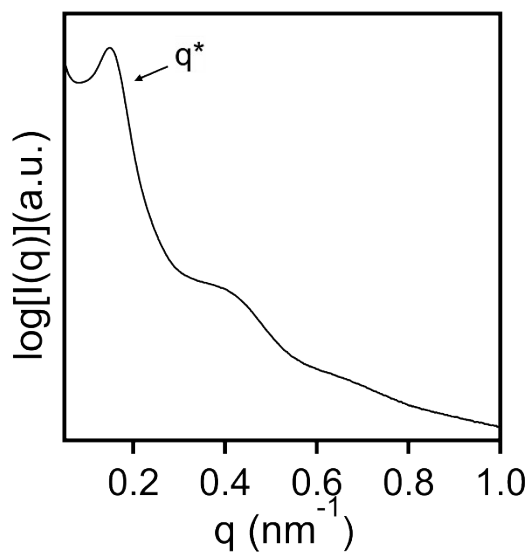

Figure S6. SAXS profiles for carbonized bulk SEBS sulfonated for 4 h.

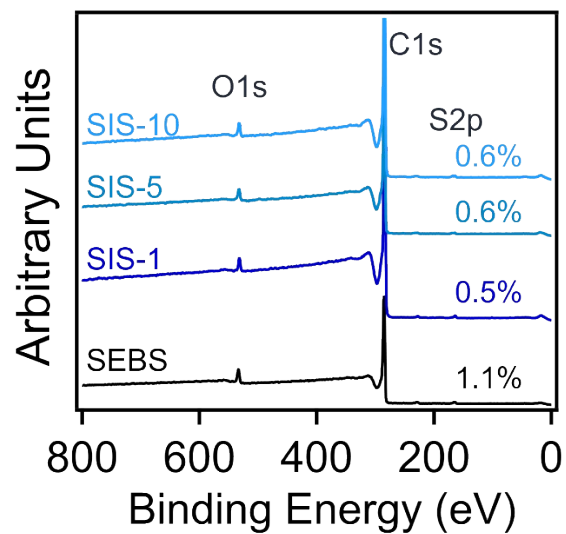

Figure S7. XPS of carbonized SEBS and SEBS/SIS blends.

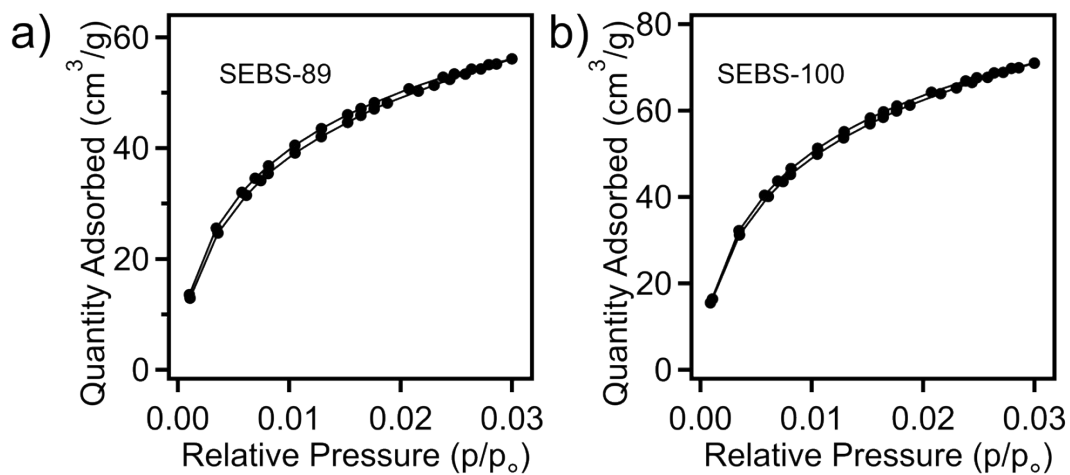

Figure S8. CO<sub>2</sub> adsorption isotherms for (a) SEBS-89 and (b) SEBS-100.

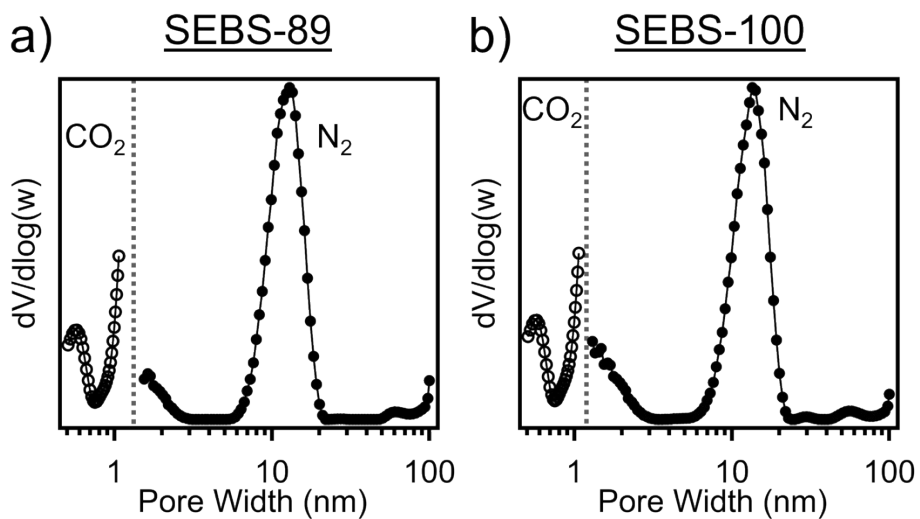

Figure S9. Pore size distributions derived from  $CO_2$  and  $N_2$  isotherms using NLDT of (a) SEBS-89 and (b) SEBS-100.

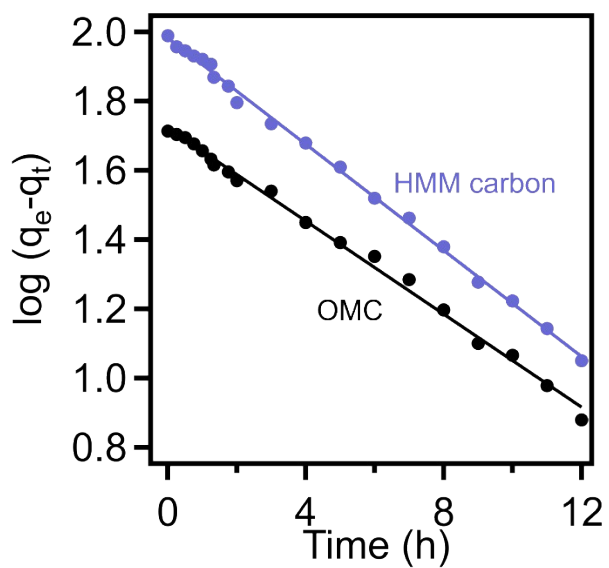

Figure S10. Pseudo first-order kinetic model fitting of adsorption kinetics at 50 mg/mL rhodamine b concentration for HMMC and an OMC control.

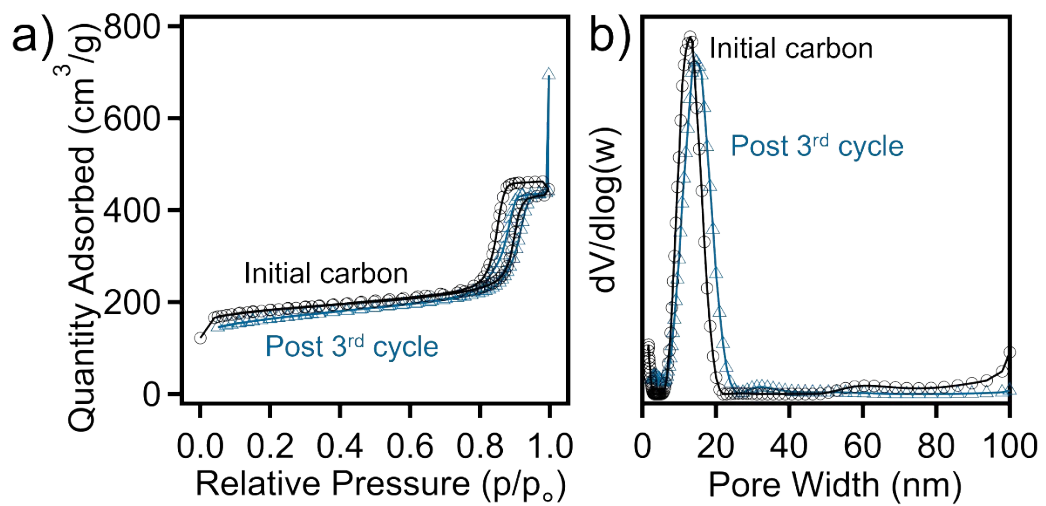

Figure S11. (a) Nitrogen adsorption isotherm and (b) corresponding pore size distribution for initial HMM carbon and carbon following regeneration after 3 cycles of dye adsorption.

Table S1. Surface roughness values for neat SEBS, SIS-1, SIS-5, and SIS-10.

| Sample | $R_{\max}$ (nm) |
|--------|-----------------|
| SEBS   | 5.4             |
| SIS-1  | 7.2             |
| SIS-5  | 21              |
| SIS-10 | 37              |

$R_{\max}$  is the largest successive value of the maximum heights within a sample length.

Table S2. HMM polymer metal adsorption isotherm parameters fit with Langmuir adsorption model.

| Metal ion        | $q_m$ (mg/g) | $K_L$ (L/mg)          | $R^2$  |
|------------------|--------------|-----------------------|--------|
| $\text{Co}^{2+}$ | 49.7         | 0.192                 | 0.9972 |
| $\text{Ni}^{2+}$ | 74.9         | $8.42 \times 10^{-3}$ | 0.9904 |



Table S3. Comparison of Co<sup>2+</sup> Langmuir adsorption isotherm parameters on HMM polymers with those of other adsorbents.

| Reference  | Adsorbent                                                                                             | Langmuir Isotherm                    |                                        | Equilibrium Time (min) |
|------------|-------------------------------------------------------------------------------------------------------|--------------------------------------|----------------------------------------|------------------------|
|            |                                                                                                       | Q <sub>m</sub> (mg g <sup>-1</sup> ) | K <sub>L</sub> (L mmol <sup>-1</sup> ) |                        |
| This paper | HMM polymer                                                                                           | 49.69                                | 0.192                                  | 20                     |
| 1          | Crosslinked 2-aminopyridine functionalized SMA copolymer                                              | 49.02                                | 0.1052                                 | N/A                    |
| 2          | Mesoporous silica SBA-15-supported surface ion imprinted polymer                                      | 39.26                                | 0.0494                                 | 300                    |
| 2          | Mesoporous silica SBA-15-supported polyethyleneimine                                                  | 12.21                                | 0.0248                                 | 300                    |
| 4          | Nanohydrogel tragacanth gum-g-polyamidoxime                                                           | 100                                  | 0.0884                                 | 60                     |
| 5          | Anthranilic acid – 2-aminopyridine – formaldehyde terpolymer                                          | 3.51                                 | 0.478                                  | N/A                    |
| 6          | Magnetic cobalt ion-imprinted polymer                                                                 | 23.09                                | 0.053                                  | 150                    |
| 6          | Magnetic cobalt non-imprinted polymer                                                                 | 16.88                                | 0.069                                  | 150                    |
| 7          | Magnetic poly(methyl methacrylate-divinylbenzene-NH <sub>2</sub> ) beads                              | 50.3                                 | 0.252                                  | 60                     |
| 8          | Fe <sub>3</sub> O <sub>4</sub> -modified ploy(methyl methacrylate-co- maleic anhydride) nanocomposite | 90.9                                 | 0.078                                  | N/A                    |

Table S4. Comparison of Ni<sup>2+</sup> Langmuir adsorption isotherm parameters on HMM polymers with those of other adsorbents.

| Reference  | Adsorbent                                                                           | Langmuir Isotherm                    |                                        | Equilibrium Time (min) |
|------------|-------------------------------------------------------------------------------------|--------------------------------------|----------------------------------------|------------------------|
|            |                                                                                     | Q <sub>m</sub> (mg g <sup>-1</sup> ) | K <sub>L</sub> (L mmol <sup>-1</sup> ) |                        |
| This paper | HMM polymer                                                                         | 74.88                                | 0.008                                  | 20                     |
| 1          | Crosslinked 2-aminopyridine functionalized SMA copolymer                            | 76.52                                | 0.044                                  | N/A                    |
| 3          | Semi-Interpenetrating polyacrylamide-potato starch cryogels                         | 9.87                                 | 0.481                                  | N/A                    |
| 5          | Anthranilic acid – 2-aminopyridine – formaldehyde terpolymer                        | 3.89                                 | 0.34                                   | N/A                    |
| 7          | Magnetic polymethyl methacrylate-divinylbenzene-NH <sub>2</sub> beads               | 49.6                                 | 0.131                                  | 60                     |
| 9          | Polyaniline@aminopropyltriethoxysilane-Fe <sub>3</sub> O <sub>4</sub> / attapulgite | 142.86                               | 0.0267                                 | 15                     |

Table S5. Regeneration efficiency of HMM carbon for three consecutive cycles of adsorption and thermal treatment.

| Cycle number | Adsorption capacity (mg/g) | Regeneration efficiency (%) |
|--------------|----------------------------|-----------------------------|
| 1            | 532                        | -                           |
| 2            | 213                        | 40                          |
| 3            | 197                        | 37                          |
| 4            | 184                        | 35                          |

## References

- 1 N. Samadi, R. Hasanzadeh and M. Rasad, *J. Appl. Polym. Sci.*, 2014, **132**, 41642.
- 2 Y. Liu, Z. Liu, J. Dai, J. Gao, J. Xie and Y. Yan, *Chin. J. Chem.*, 2011, **29**, 387–398.
- 3 D. F. Apopei, M. V. Dinu, A. W. Trochimczuk and E. S. Dragan, *Ind. Eng. Chem. Res.*, 2012, **51**, 10462–10471.
- 4 A. Masoumi and M. Ghaemy, *Carbohydr. Polym.*, 2014, **108**, 206–215.
- 5 R. S. Azarudeen, R. Subha, D. Jeyakumar and A. R. Burkanudeen, *Sep. Purif. Technol.*, 2013, **116**, 366–377.
- 6 R. Kang, L. Qiu, L. Fang, R. Yu, Y. Chen, X. Lu and X. Luo, *J. Environ. Chem. Eng.*, 2016, **4**, 2268–2277.
- 7 Z. Lin, Y. Zhang, Y. Chen and H. Qian, *Chem. Eng. J.*, 2012, **200–202**, 104–112.
- 8 A. Masoumi, M. Ghaemy and A. N. Bakht, *Ind. Eng. Chem. Res.*, 2014, **53**, 8188–8197.
- 9 P. Sun, W. Zhang, B. Zou, X. Wang, L. Zhou, Z. Ye and Q. Zhao, *Appl. Clay Sci.*, 2021, **209**, 106151.
